# Supplementary material
Source: Springer Nature journal article supplement (https://www.springermedizin.de/resource/supplementary/12967_2008_291_MOESM5_ESM.pdf/9576124)

Standard Curve - single primer/probe check 10/25

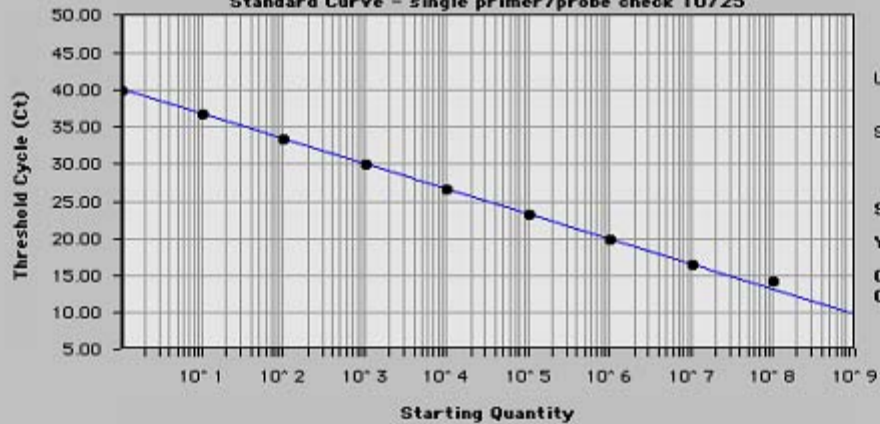

Supplement: MOESM5 [file 9576124]
